# Supplementary material for: Two unprecedented NLO-active coordination polymers constructed by a semi-rigid tetrahedral linker
Source: Royal Society of Chemistry journal article supplement (doi:10.1039/c0dt00255k), 2010-01-01
Supplement: c0dt00255k.pdf [file c0dt00255k.pdf]

## Two unprecedented NLO-active coordination polymers constructed by a semi-rigid tetrahedral linker

Li-Li Liang, Shi-Bin Ren, Jun Zhang, Yi-Zhi Li, Hong-Bin Du\* and Xiao-Zeng You  
*State Key Laboratory of Coordination Chemistry, School of Chemistry and Chemical  
Engineering, Nanjing University, Nanjing 210093, China. E-mail: [hbdu@nju.edu.cn](mailto:hbd@nju.edu.cn)*

### Supporting Information

#### Contents:

1. Figure S1. The asymmetric unit of complex **1**.
2. Figure S2. Coordination environments of binuclear Zn<sub>2</sub> units in **1**.
3. Figure S4. PXRD patterns for **1**.
4. Figure S5. PXRD patterns for **2**.

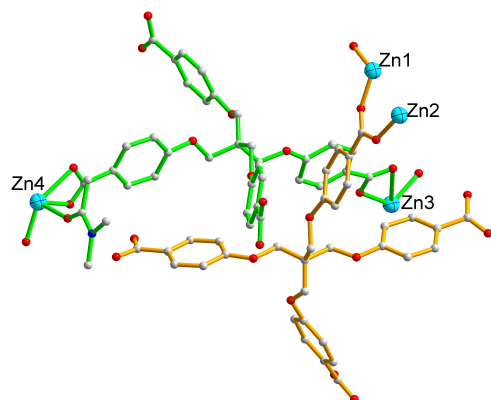

**Figure S1.** Perspective view of the asymmetric units of complex **1**.

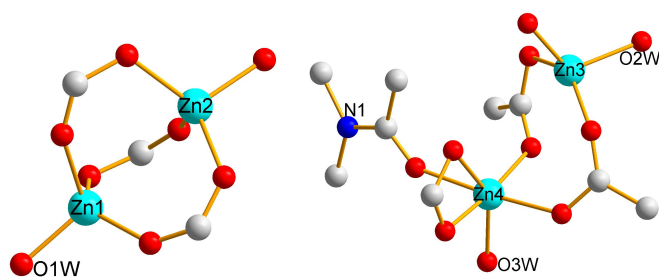

**Figure S2.** The different coordination environments of Zn1Zn2 and Zn3Zn4 binuclear Zn<sub>2</sub> units in **1**.

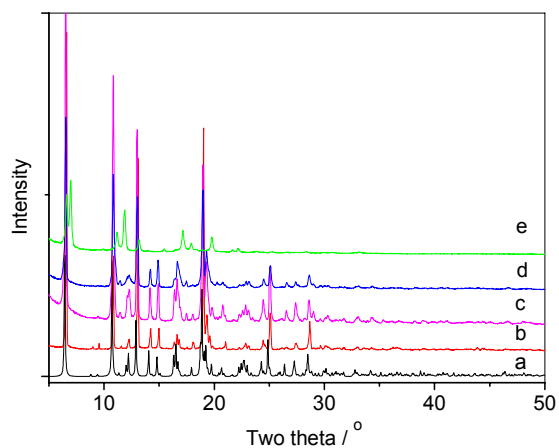

**Figure S3.** PXRD patterns for **1**: (a) simulated (black), (b) as-synthesized (red), (c) heated at 100°C for 2h (magenta), (d) heated at 200°C for 2h (blue), (e) heated at 300°C for 2h (green) in air.

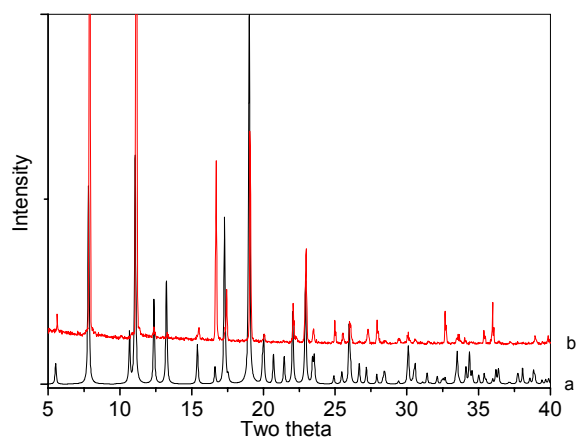

**Figure S4.** PXRD patterns for **2**: (a) simulated (black), (b) as-synthesized (red).
